# Supplementary material
Source: PubMed Central journal article supplement (PMC4047479)
Supplement: supp_M113.034140_mcp.M113.034140-1.pdf [file supp_M113.034140_mcp.M113.034140-1.pdf]

**HPA006723 [LIG3]**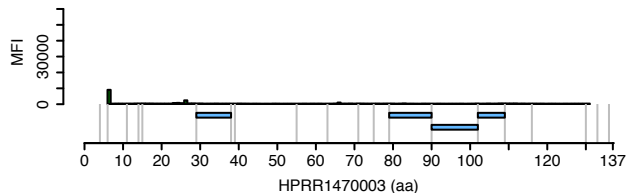**HPA008061 [MARK1]**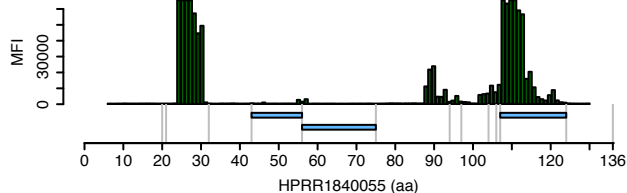**HPA007446 [CDKL3]**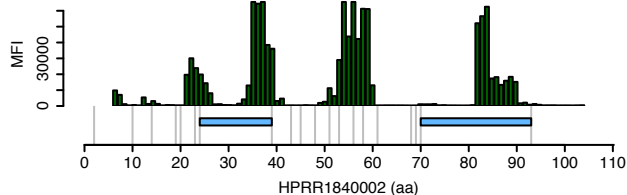**HPA008237 [OXSR1]**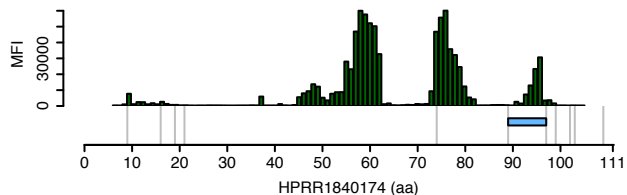**HPA007625 [MAP3K4]**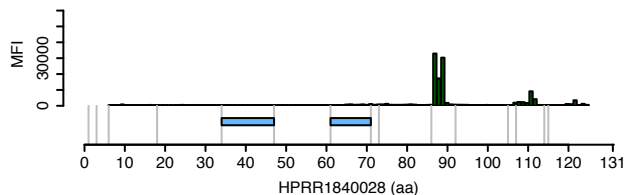**HPA011753 [CAMK4]**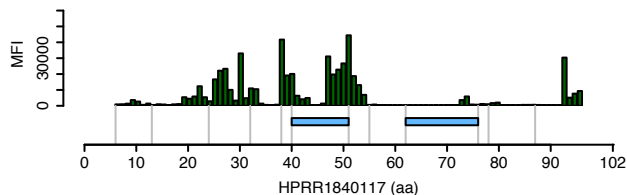**HPA007656 [CAMKV]**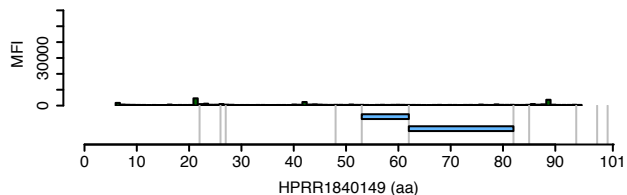**HPA012066 [SGK223]**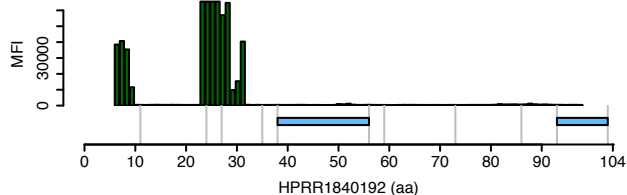**HPA007667 [MAPK13]**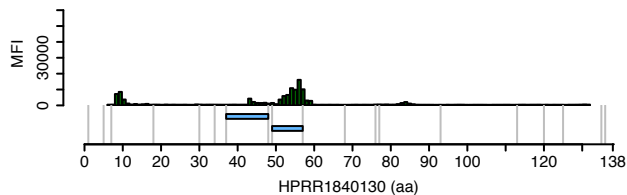**HPA014290 [FLT1]**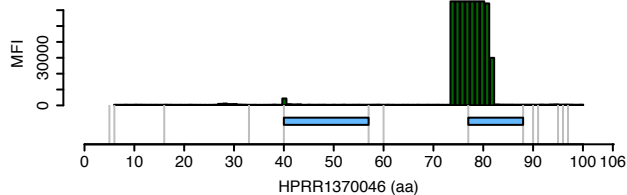

**HPA015272 [TRIB3]**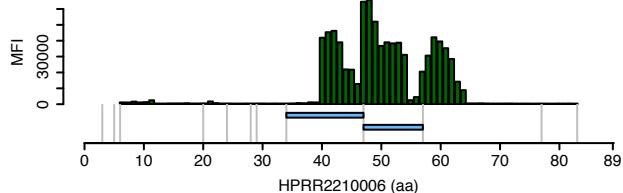**HPA018888 [STAT2]**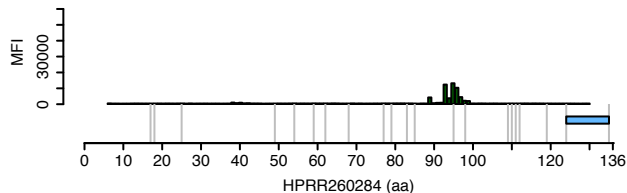**HPA015876 [HSPB8]**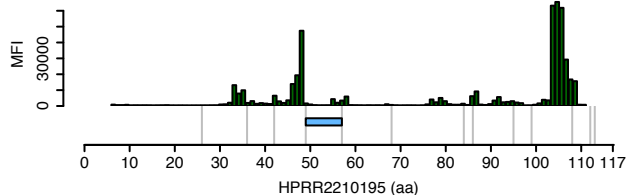**HPA018903 [GRK6]**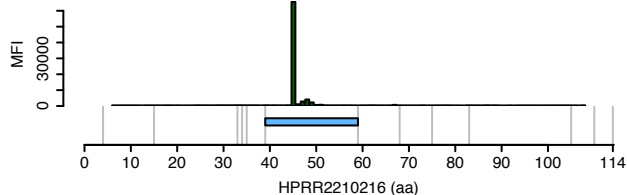**HPA016043 [TLK1]**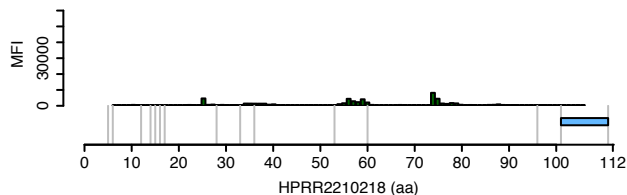**HPA018911 [ARHGEF12]**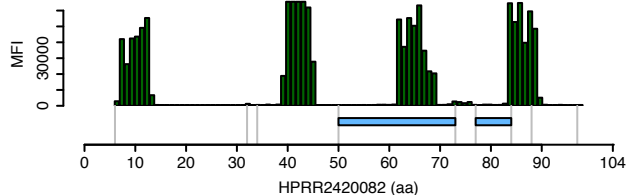**HPA016908 [NEK11]**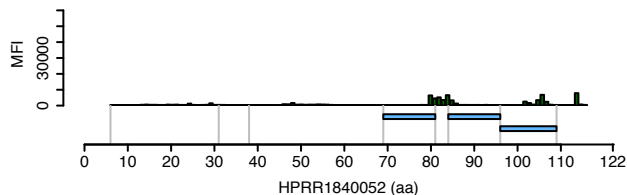**HPA019880 [CBLB]**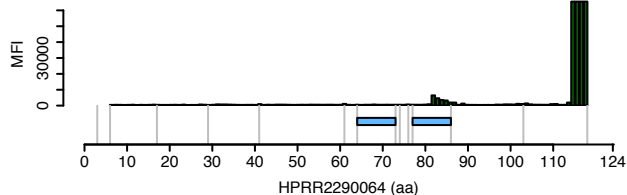**HPA018467 [IL16]**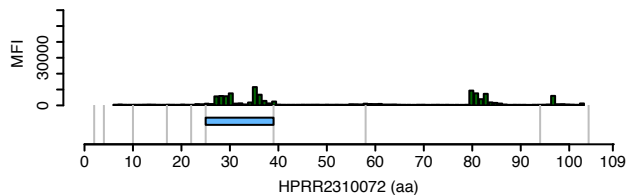**HPA020326 [DUSP16]**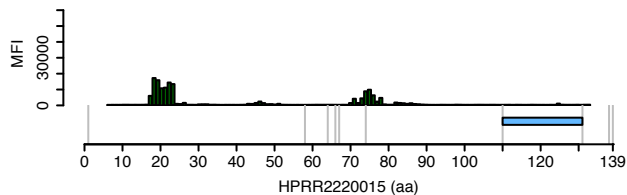

**HPA020444 [PAK7]**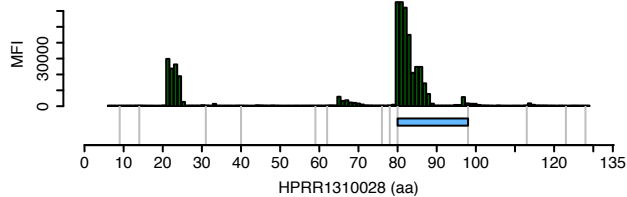**HPA026091 [PTK2B]**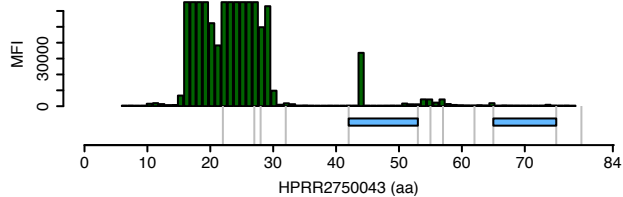**HPA022992 [SIRT5]**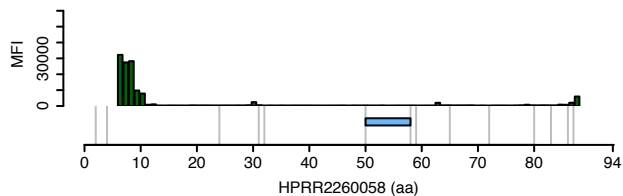**HPA027257 [TESK2]**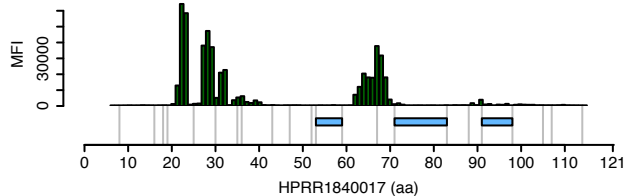**HPA023194 [STK31]**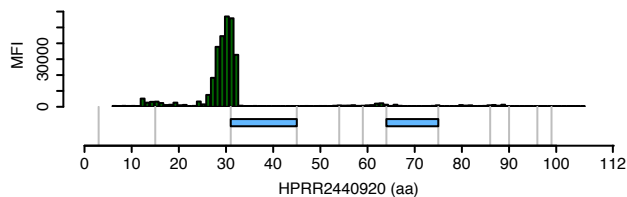**HPA027976 [ALPK2]**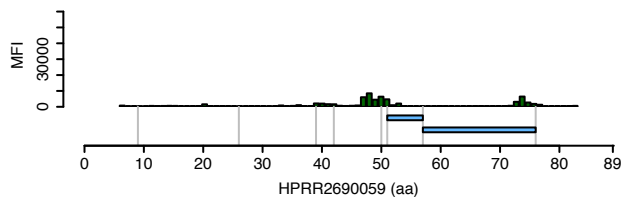**HPA023887 [FYN]**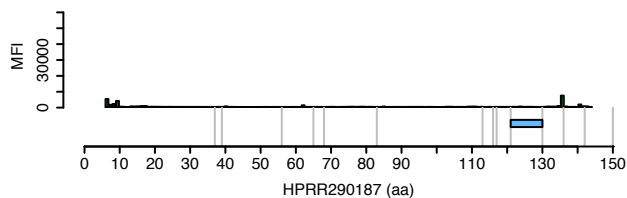**HPA028869 [UBE2K]**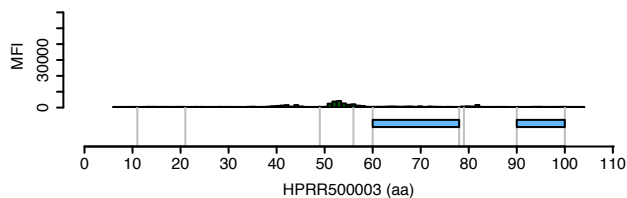**HPA024184 [RIOK3]**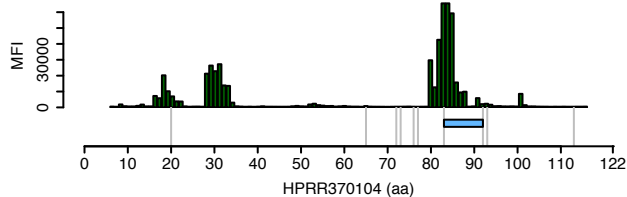**HPA029678 [ADRA1A]**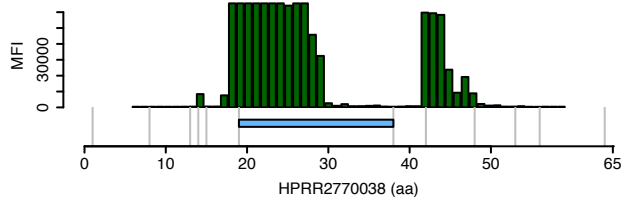

**HPA029754 [PRKACB]**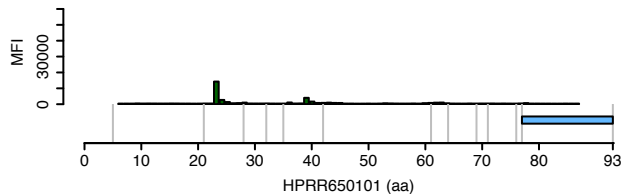**HPA034525 [PTPRO]**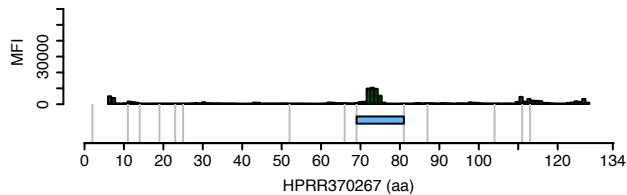**HPA029834 [PRKD1]**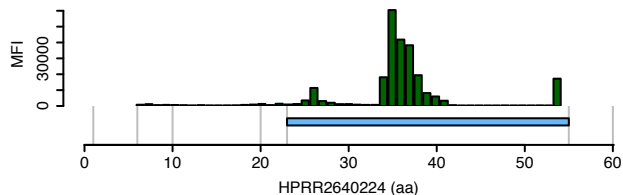**HPA034641 [RIN2]**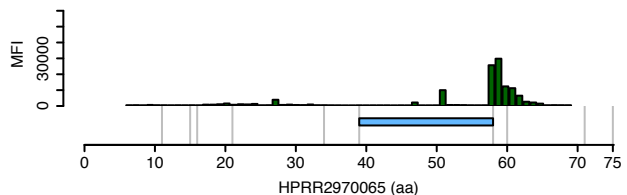**HPA030345 [RHOH]**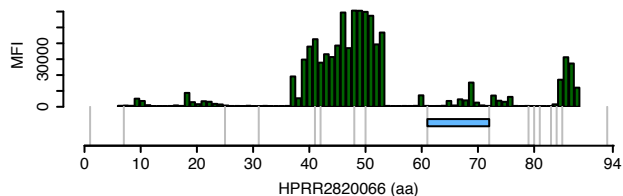**HPA035223 [MAML2]**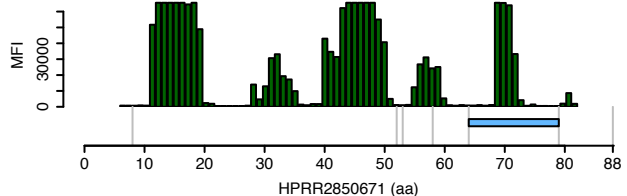**HPA031032 [ABP1]**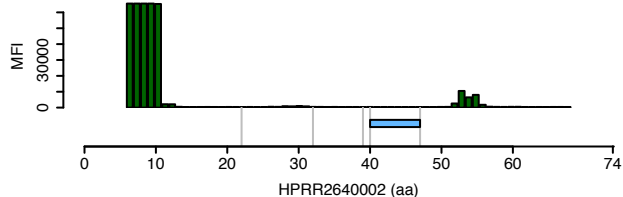**HPA035344 [PP1L2]**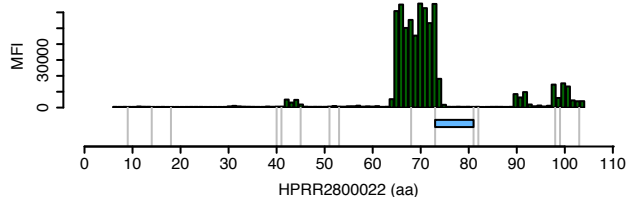**HPA031124 [PAK6]**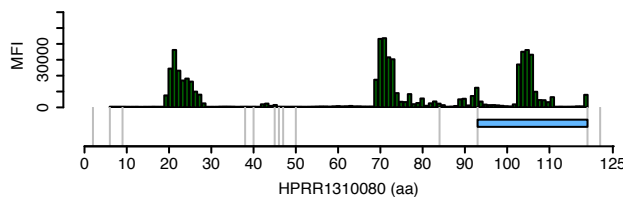**HPA036036 [ADCK2]**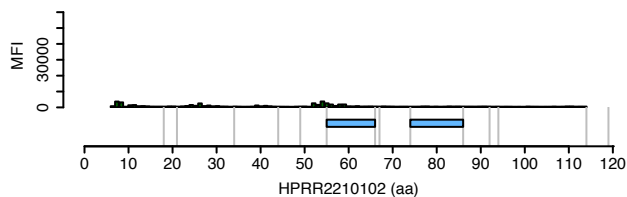

HPA036623 [OTUD4]

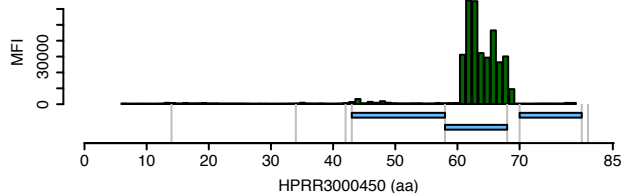

HPA038337 [BCR;BCR/ABL fusion]

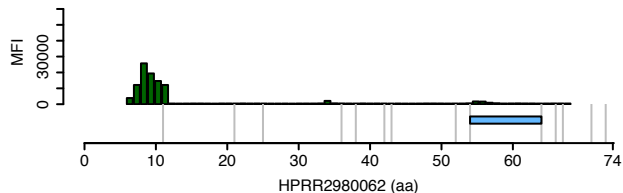

HPA036978 [PGAM5]

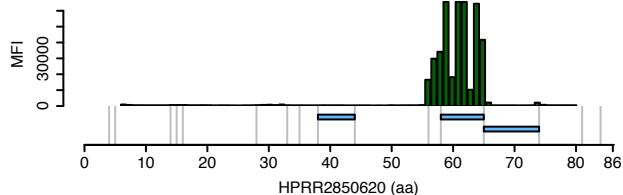

HPA038461 [CS]

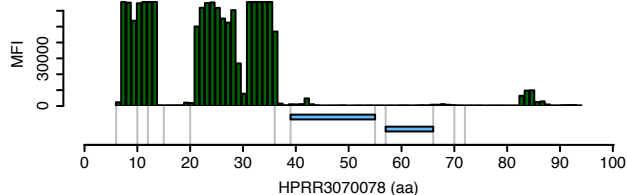

HPA037422 [AXL]

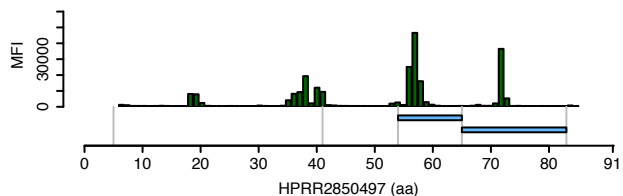

HPA038822 [PDZRN3]

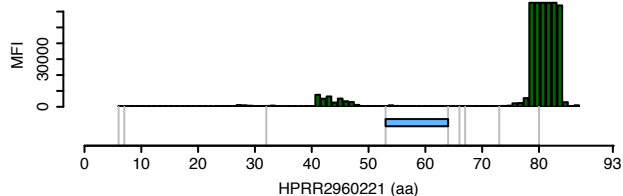

HPA037655 [GUCY2C]

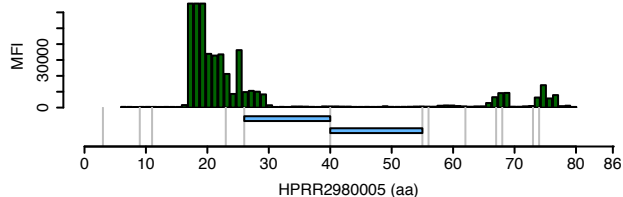

HPA039409 [RNMT]

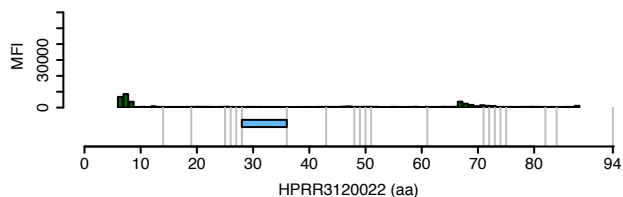

HPA037767 [HECTD2]

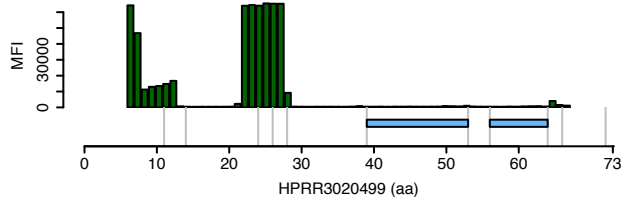

HPA040067 [GAPDH]

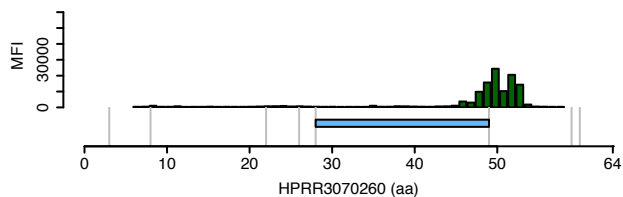

**HPA041012 [UBE3B]**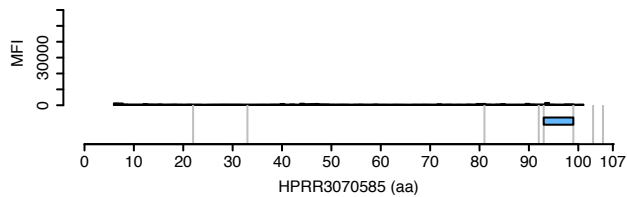**HPA051673 [STK35]**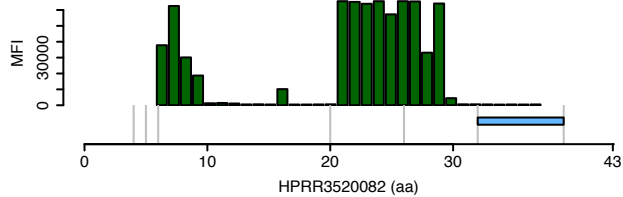**HPA042163 [SNRK]**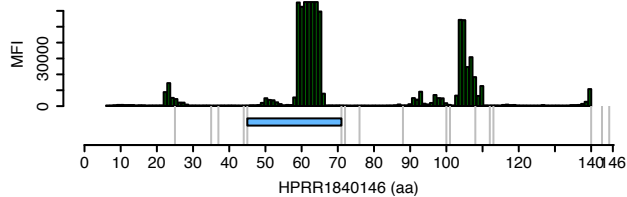**HPA053304 [OTUD6A]**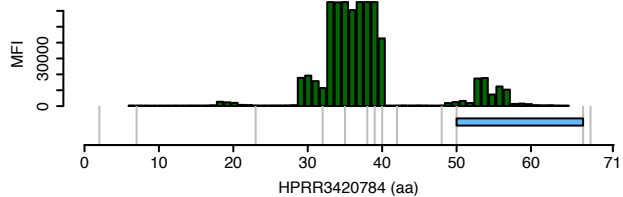**HPA042497 [ESCO1]**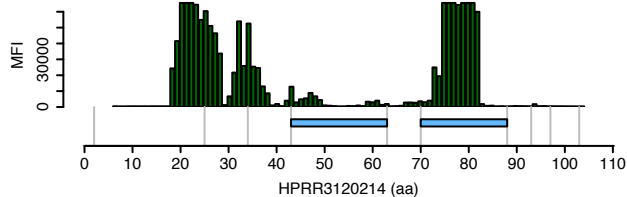**HPA046623 [BRMS1L]**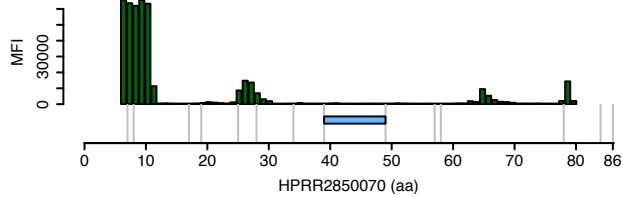**HPA042918 [CCL27]**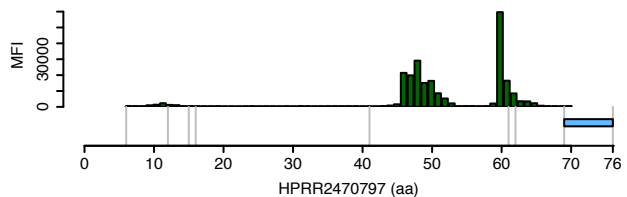**Supplementary Figure 1 - Comparison of mapped epitopes and peptides identified in immuno-SILAC screening of polyclonal antibodies.**

The upper part of each panel shows the binding intensities to overlapping 12-mer peptides in the epitope mapping, where epitopes show as clusters of bound peptides. Blue horizontal bars in the lower part show the locations of peptides identified in immuno-SILAC screening on their corresponding antigen and grey vertical lines indicate trypsin cleavage sites.
