# Supplementary material
Source: PubMed Central journal article supplement (PMC4047479)
Supplement: supp_M113.034140_mcp.M113.034140-2.pdf [file supp_M113.034140_mcp.M113.034140-2.pdf]

**Supplementary Table 1 - List of identified peptides after peptide enrichment together with their corresponding antibody and target gene.**

| Gene name                                           | Protein Description                                                                                                                                                                                                                                                                                                                                      | HPA-ID                                                                     | Sequence                                                                                                                                                         |
|-----------------------------------------------------|----------------------------------------------------------------------------------------------------------------------------------------------------------------------------------------------------------------------------------------------------------------------------------------------------------------------------------------------------------|----------------------------------------------------------------------------|------------------------------------------------------------------------------------------------------------------------------------------------------------------|
| ABP1<br>ACOT7                                       | Amine oxidase:Amloride-sensitive amine oxidase (copper-containing)<br>acyl-CoA thioesterase 7                                                                                                                                                                                                                                                            | HPA031032<br>HPA025762                                                     | SWLIQR<br>SMEIEVLVDADPVVDSSQKR<br>SLPVPQLVPETEDEKRR<br>LHVSSLLSSVFK                                                                                              |
| ADCK2                                               | Uncharacterized aarF domain-containing protein kinase 2                                                                                                                                                                                                                                                                                                  | HPA036036                                                                  | TEMAMLVQTQAR<br>HALGYTLHPPSQAVVEGQHK<br>ILESSVDPIDEISVIEYTR<br>FLTCPK                                                                                            |
| ADRA1A<br>ALPK2                                     | Alpha-1A adrenergic receptor<br>Alpha-protein kinase 2                                                                                                                                                                                                                                                                                                   | HPA029678<br>HPA027976                                                     | AAYLQETGKPLDETLKK<br>GVDEATIIDLTKR<br>GVDEATIIDLTK<br>ALYEAGER                                                                                                   |
| ANXA1                                               | annexin A1                                                                                                                                                                                                                                                                                                                                               | HPA028519                                                                  | RDESLKVDEHLAK<br>DLGLES TLISSK PQSHSLSTSGK<br>DLFVAER<br>LAYQGQDTPVELMDIGLR                                                                                      |
| ANXA3<br>ARRHGEF12                                  | annexin A3<br>Rho guanine nucleotide exchange factor 12                                                                                                                                                                                                                                                                                                  | HPA011271<br>HPA013398<br>HPA018911                                        | APLQGTLLGYR<br>MIYLQTLAK<br>VVACTSAFLWDPKTKVPPR<br>LYYDGEWYIR                                                                                                    |
| AXL                                                 | Tyrosine-protein kinase receptor UFO                                                                                                                                                                                                                                                                                                                     | HPA037422                                                                  | VADLEEEGLEEEK<br>GADINAEAPK<br>ITAEAEISHWISGNAASDK<br>LMEVEQDQR                                                                                                  |
| BCR/BCR/ABL fusion<br>BLVRB<br>BRMS1L<br>CAMK4      | Breakpoint cluster region protein<br>biliverdin reductase B (flavin reductase (NADPH))<br>Breast cancer metastasis-suppressor 1-like protein<br>Calcium/calmodulin-dependent protein kinase type IV                                                                                                                                                      | HPA038337<br>HPA041937<br>HPA046623<br>HPA011753                           | VAVEWDKDHGVLESHLAEK<br>EGNPEEDLTADKANAAQAALYK<br>HDLPLEGAK<br>VGSDPVLMR                                                                                          |
| CAMKV                                               | CaM kinase-like vesicle-associated protein                                                                                                                                                                                                                                                                                                               | HPA007656                                                                  | LNFGMRL<br>TVYTNLLSSSVLGG<br>EYEGGLQQDANENVHPMSPDTK<br>QSLQVIESAMERDR                                                                                            |
| CANT1<br>CAPG<br>CBLB;DKFZp779A0729                 | calcium activated nucleotidase 1<br>capping protein (actin filament), gelsolin-like<br>E3 ubiquitin-protein ligase CBL-B                                                                                                                                                                                                                                 | HPA019639<br>HPA019092<br>HPA019880                                        | GLVYETSVLPDPEGIR<br>GFSIPECCOK<br>EDKSPIAPEELALVHNLK<br>REDKSPIAPEELALVHNLK<br>EDKSPIAPEELALVHNLK<br>SPIAPEELALVHNLK<br>SPIAPEELALVHNLK<br>KAYLPOELLGK           |
| CCL27<br>CDKL3                                      | C-C motif chemokine 27<br>Cyclin-dependent kinase-like 3                                                                                                                                                                                                                                                                                                 | HPA042918<br>HPA007446                                                     | VHAIQCDVRDPMVQNTVSELIK<br>AALRPTDVVLEVGPGTGNMTVK<br>LCQFSVQLESEQTPE TSPDK<br>ESSLPSKEALEPSEGENVIQNK                                                              |
| CLPP<br>CS                                          | ClpP caseinolytic peptidase, ATP-dependent, proteolytic subunit homolog (E. coli)<br>Citrate synthase, mitochondrial;Citrate synthase                                                                                                                                                                                                                    | HPA010649<br>HPA038461                                                     | EALPSPGENVIQNK<br>FPGSAPQQHSILSNQTSK<br>LENSPVENVTAASTLLSQAK<br>QNTNIIDVQISTPRPVK<br>VQMTWSYPDEK<br>QLLSFGNPR<br>WGDAGA EYVVESTGVFTTMEK<br>QLTQNFLSHTGADLPIEVPFR |
| DAP3                                                | death associated protein 3                                                                                                                                                                                                                                                                                                                               | HPA023687                                                                  | FNLPTPTVENQQR<br>LQAEFSDMIANSLOK<br>APVLPPELPIQPK<br>DFQEDVEK                                                                                                    |
| DECR1<br>DIMIT1<br>DUSP16<br>ERLIN1                 | 2,4-dienoyl CoA reductase 1, mitochondrial<br>DIM1 dimethyladenosine transferase 1 homolog (S. cerevisiae)<br>Dual specificity protein phosphatase 16<br>ER lipid raft associated 1                                                                                                                                                                      | HPA023238<br>HPA042944<br>HPA020326<br>HPA011252                           | FGVPAEGR<br>LYSISQVSSAVMK<br>DLEQGDVSETIR<br>IFNCNPDDMAR<br>VFFEQSK<br>TQIQDFLR<br>QQLLQOQMLADA EK<br>TINDQDFLYTAR<br>VDYGSFAEVR<br>SYIQSLPOTPR<br>DFTQLFPR      |
| ESCO1                                               | N-acetyltransferase ESCO1                                                                                                                                                                                                                                                                                                                                | HPA042497                                                                  | KPPEFEGGESLSSGNLCQR<br>YDEVMATYILLGR<br>FSDHAGPSIPPAVSYTK<br>IVEGDTPLSPER<br>NPSLRPSAIEIK<br>ELNAIMESMLNK<br>ADTALASIPPAEKG<br>AHPPTQILNR<br>ETVPVELEPK          |
| FLT1                                                | Vascular endothelial growth factor receptor 1                                                                                                                                                                                                                                                                                                            | HPA014290                                                                  | QESIFQAEEMSEHLAGFK<br>IPISLVR<br>GVAVDYLPER<br>AQSLPSDQPVGTGFSPLTSDTSSPQK                                                                                        |
| FYN<br>GAPDH<br>GRK6<br>GUCY2C                      | Tyrosine-protein kinase Fyn<br>Glyceraldehyde-3-phosphate dehydrogenase<br>G protein-coupled receptor kinase 6<br>Heat-stable enterotoxin receptor                                                                                                                                                                                                       | HPA023887<br>HPA040067<br>HPA018903<br>HPA037655                           | SSGGLQEPMMFPGASAFK<br>KVELFHYQDGAFTHEYNR<br>VELFHYQDGAFTHEYNR<br>GYPTFHYYHYGK                                                                                    |
| HECTD2                                              | Probable E3 ubiquitin-protein ligase HECTD2                                                                                                                                                                                                                                                                                                              | HPA037767                                                                  | ELDPNQPLESK<br>HIFLIR<br>TLTPLGR<br>EQAELTGLR                                                                                                                    |
| HSPB8<br>IL16<br>LIG3                               | Heat shock protein beta-8<br>Pro-interleukin-16;Interleukin-16<br>DNA ligase 3                                                                                                                                                                                                                                                                           | HPA015876<br>HPA018467<br>HPA006723                                        | YINPAATK<br>WENPTONNAGLEDFER<br>YAGEQGLQYPTHINPSASHSDTPETEEMK<br>GHNTNVAIVFHPK<br>QMVEDYQWLR<br>EEAQQWLWEAK<br>ELSHEDLEPPPEHIPPPRPPKR<br>ELSHEDLEPPPEHIPPPRPPK   |
| MAML2<br>MAP3K4                                     | Mastermind-like protein 2<br>Mitogen-activated protein kinase kinase kinase 4                                                                                                                                                                                                                                                                            | HPA035223<br>HPA007625                                                     | TAPYPPQNISVR<br>TAPYPPQNISVR<br>GVQQVFCAVR<br>TDVNLNLENGLEPAETHSMVR<br>VVISFENYR                                                                                 |
| MAPK13                                              | Mitogen-activated protein kinase 13                                                                                                                                                                                                                                                                                                                      | HPA007667                                                                  | EFEDDLVK<br>SGGGGDHOGFQSLLETVNK<br>HINTWVAEK<br>IEEEEEVEQELLSHSWGR<br>SASF AFEFPK<br>LNLQ TGER<br>WVEFYHYR<br>TGQYSGIDCAK                                        |
| MARK1                                               | Serine/threonine-protein kinase MARK1                                                                                                                                                                                                                                                                                                                    | HPA008061                                                                  | DDLPELAGPALTVPASLKPTASGR<br>LTTLELLLPK<br>SEVNGQILLK<br>YMNSSGLLTMSLER                                                                                           |
| NEK11                                               | Serine/threonine-protein kinase Nek11                                                                                                                                                                                                                                                                                                                    | HPA016908                                                                  | SSQLYLR<br>VGHFDPVTR<br>TVSVLDPYYRPR<br>VNPFSAR<br>TIWLSR                                                                                                        |
| OTUD4                                               | OTU domain-containing protein 4                                                                                                                                                                                                                                                                                                                          | HPA036623                                                                  | IIQDTLMLK<br>LTATGILLHPWLR<br>QDPMPLAPTR                                                                                                                         |
| OTUD6A<br>OXSR1<br>P4HA1<br>PAK6<br>PAK7<br>PDIA5   | OTU domain-containing protein 6A<br>Serine/threonine-protein kinase OSR1<br>prolyl 4-hydroxylase, alpha polypeptide I<br>Serine/threonine-protein kinase PAK 6<br>Serine/threonine-protein kinase PAK 7<br>protein disulfide isomerase family A, member 5                                                                                                | HPA053304<br>HPA008237<br>HPA026593<br>HPA031124<br>HPA020444<br>HPA030354 | ELDPNQPLESK<br>HIFLIR<br>TLTPLGR<br>EQAELTGLR                                                                                                                    |
| PDZRN3<br>PGAM5                                     | E3 ubiquitin-protein ligase PDZRN3<br>Serine/threonine-protein phosphatase PGAM5, mitochondrial                                                                                                                                                                                                                                                          | HPA038822<br>HPA036978                                                     | YINPAATK<br>WENPTONNAGLEDFER<br>YAGEQGLQYPTHINPSASHSDTPETEEMK<br>GHNTNVAIVFHPK<br>QMVEDYQWLR<br>EEAQQWLWEAK<br>ELSHEDLEPPPEHIPPPRPPKR<br>ELSHEDLEPPPEHIPPPRPPK   |
| PPIL2<br>PRKACB<br>PRK01<br>PRPF4<br>PTK2B          | Peptidyl-prolyl cis-trans isomerase-like 2;Peptidyl-prolyl cis-trans isomerase<br>cAMP-dependent protein kinase catalytic subunit beta<br>Serine/threonine-protein kinase D1<br>PRP4 pre-mRNA processing factor 4 homolog (yeast)<br>Protein-tyrosine kinase 2-beta                                                                                      | HPA035344<br>HPA029754<br>HPA029834<br>HPA022248<br>HPA026091              | YINPAATK<br>WENPTONNAGLEDFER<br>YAGEQGLQYPTHINPSASHSDTPETEEMK<br>GHNTNVAIVFHPK<br>QMVEDYQWLR<br>EEAQQWLWEAK<br>ELSHEDLEPPPEHIPPPRPPKR<br>ELSHEDLEPPPEHIPPPRPPK   |
| PTPN1                                               | protein tyrosine phosphatase, non-receptor type 1                                                                                                                                                                                                                                                                                                        | HPA012542                                                                  | TAPYPPQNISVR<br>TAPYPPQNISVR<br>GVQQVFCAVR<br>TDVNLNLENGLEPAETHSMVR<br>VVISFENYR                                                                                 |
| PTPRO<br>RHOH<br>RIN2<br>RIOK3<br>RNMT<br>SERPINB6  | Receptor-type tyrosine-protein phosphatase O<br>Rho-related GTP-binding protein RhoH<br>Ras and Rab interactor 2<br>Serine/threonine-protein kinase RIO3<br>mRNA cap guanine-N7 methyltransferase<br>serpin peptidase inhibitor, clade B (ovalbumin), member 6                                                                                           | HPA034525<br>HPA030345<br>HPA034641<br>HPA024184<br>HPA039409<br>HPA009668 | SSQLYLR<br>VGHFDPVTR<br>TVSVLDPYYRPR<br>VNPFSAR<br>TIWLSR                                                                                                        |
| SGK223                                              | Tyrosine-protein kinase SgK223                                                                                                                                                                                                                                                                                                                           | HPA012066                                                                  | IIQDTLMLK<br>LTATGILLHPWLR<br>QDPMPLAPTR                                                                                                                         |
| SIL1<br>SIRT5<br>SLC25A24<br>SNRK<br>STAT2<br>STK31 | SIL1 homolog, endoplasmic reticulum chaperone (S. cerevisiae)<br>NAD-dependent protein deacetylase sirtuin-5, mitochondrial<br>solute carrier family 25 (mitochondrial carrier; phosphate carrier), member 24<br>SNF-related serine/threonine-protein kinase<br>Signal transducer and activator of transcription 2<br>Serine/threonine-protein kinase 31 | HPA011302<br>HPA022992<br>HPA028519<br>HPA042163<br>HPA018888<br>HPA023194 | SSQLYLR<br>VGHFDPVTR<br>TVSVLDPYYRPR<br>VNPFSAR<br>TIWLSR                                                                                                        |
| STK35<br>STUB1<br>TESK2                             | Serine/threonine-protein kinase 35<br>STIP1 homology and U-box containing protein 1, E3 ubiquitin protein ligase<br>Dual specificity testis-specific protein kinase 2                                                                                                                                                                                    | HPA051673<br>HPA041222<br>HPA027257                                        | IIQDTLMLK<br>LTATGILLHPWLR<br>QDPMPLAPTR                                                                                                                         |
| TLK1<br>TRIB3                                       | Serine/threonine-protein kinase tousled-like 1<br>Tribbles homolog 3                                                                                                                                                                                                                                                                                     | HPA016043<br>HPA015272                                                     | LW AHVYAGAPVSSPEYTK<br>NAVIVALSSK<br>FIIFLR<br>RIPYAPSGEIPK                                                                                                      |
| UBE2K                                               | Ubiquitin-conjugating enzyme E2 K                                                                                                                                                                                                                                                                                                                        | HPA028869                                                                  | LW AHVYAGAPVSSPEYTK<br>NAVIVALSSK<br>FIIFLR<br>RIPYAPSGEIPK                                                                                                      |
| UBE3B<br>UGDH                                       | Ubiquitin-protein ligase E3B<br>UDP-glucose 6-dehydrogenase                                                                                                                                                                                                                                                                                              | HPA041012<br>HPA036656                                                     | LW AHVYAGAPVSSPEYTK<br>NAVIVALSSK<br>FIIFLR<br>RIPYAPSGEIPK                                                                                                      |
